# Supplementary material
Source: publisher figshare collection journal article supplement (https://acs.figshare.com/ndownloader/files/4645216)
Supplement: Supplementary file 1 [file 4645216]

## Supporting Information for the article:

### An Easily Accessible 3:1 Site-Differentiated [4Fe-4S] Cluster and Its Reaction with *p*-Fluorothiophenol

Erwin P. L. van der Geer,<sup>†</sup> Gerard van Koten,<sup>†</sup> Robertus J. M. Klein Gebbink,<sup>\*†</sup> and Bart Hessen<sup>\*†‡</sup>

<sup>†</sup>Chemical Biology & Organic Chemistry, Faculty of Science, Universiteit Utrecht, Padualaan 8, 3584 CH Utrecht, The Netherlands

<sup>‡</sup>Stratingh Institute, University of Groningen, Nijenborgh 4, 9747 AG Groningen, The Netherlands

### Synthesis and characterization of compounds 1 and 2.

Indole, thiourea, I<sub>2</sub>, and KI were purchased from Acros and used as received. The synthesis of **2** was conducted under inert conditions using standard Schlenk techniques; solvents were flushed with N<sub>2</sub> before use.

**3-Thiouroniumindole iodide (1).** To a solution of indole (3.00 g, 25.6 mmol) and thiourea (1.95 g, 25.6 mmol) in a mixture of MeOH (80 mL) and water (20 mL) were added I<sub>2</sub> (6.50 g, 25.6 mmol) and KI (4.25 g, 25.6 mmol). After 3 days, the solution was concentrated to a black oil, which crystallized upon agitation. The product was washed with water and ether and recrystallized twice from acetone/diethyl ether. Yield: 7.17 g (22.5 mmol, 88%). Anal. Calcd for C<sub>9</sub>H<sub>10</sub>IN<sub>3</sub>S: C, 33.87; H, 3.16; N, 13.17; S, 10.05. Found: C, 33.75; H, 3.08; N, 12.98; S, 10.07. <sup>1</sup>H NMR (DMSO-*d*<sub>6</sub>): δ = 12.11 (s, broad, 1H, indolyl NH), 8.85 (s, broad, 2H, NH<sub>2</sub>), 8.52 (s, broad, 2H, NH<sub>2</sub>), 7.96 (d, <sup>3</sup>J<sub>H-H</sub> = 2.7 Hz, 1H, indolyl H2), 7.55 (d, <sup>3</sup>J<sub>H-H</sub> = 8.2 Hz, 1H, indolyl H), 7.50 (d, <sup>3</sup>J<sub>H-H</sub> = 7.6 Hz, 1H, indolyl H), 7.27 (td, <sup>3</sup>J<sub>H-H</sub> = 7.5 Hz, <sup>4</sup>J<sub>H-H</sub> = 1.3 Hz, 1H, indolyl H), 7.21 (td, <sup>3</sup>J<sub>H-H</sub> = 7.4 Hz, <sup>4</sup>J<sub>H-H</sub> = 1.2 Hz, 1H, indolyl H). <sup>13</sup>C{<sup>1</sup>H} NMR (DMSO-*d*<sub>6</sub>): δ = 170.73 (SC(NH<sub>2</sub>)<sub>2</sub>), 136.79, 135.90, 128.26, 122.73, 121.03, 117.52, 112.77 (7 × indolyl C), 89.90 (indolyl CS). FT-IR (ATR, ν, cm<sup>-1</sup>): 3288, 3250, 3132, 3090, 1689, 1637, 1607, 1457, 1425, 1412, 1342, 1284, 1237, 1127, 1042, 1008, 846, 739, 681.

**Indole-3-thiol (2).** A suspension of **1** (5.00 g, 15.7 mmol) in aqueous 2 M NaOH (60 mL) was heated to 100 °C for 15 min under constant stirring. After cooling to ambient temperature, the solution was filtered and aqueous 10 M HCl (12.5 mL) was added. A yellow precipitate formed, and the mixture was extracted with CH<sub>2</sub>Cl<sub>2</sub> (3 × 10 mL). The combined organic extracts were dried over MgSO<sub>4</sub> and evaporated to a yellow, microcrystalline material. Yield: 2.14 g (14.4 mmol, 92%). Anal. Calcd for C<sub>8</sub>H<sub>7</sub>NS: C, 64.39; H, 4.73; N, 9.39; S, 21.49. Found: C, 64.27; H, 4.65; N, 9.20; S, 21.32. <sup>1</sup>H NMR (DMSO-*d*<sub>6</sub>): δ = 11.25 (s, broad, 1H, NH), 7.56 (d, <sup>3</sup>J<sub>H-H</sub> = 7.1 Hz, 1H, indolyl H), 7.43 (d, <sup>3</sup>J<sub>H-H</sub> = 2.5 Hz, 1H, indolyl H2), 7.39 (d, <sup>3</sup>J<sub>H-H</sub> = 7.1 Hz, 1H, indolyl H), 7.14 (td, <sup>3</sup>J<sub>H-H</sub> = 7.2 Hz, <sup>4</sup>J<sub>H-H</sub> = 1.4 Hz, 1H, indolyl H), 7.08 (td, <sup>3</sup>J<sub>H-H</sub> = 7.1 Hz, <sup>4</sup>J<sub>H-H</sub> = 1.1 Hz, 1H, indolyl H), 4.23 (s, broad, 1H, SH). <sup>13</sup>C{<sup>1</sup>H} NMR (DMSO-*d*<sub>6</sub>): δ = 136.16, 129.37, 128.83, 121.66, 119.26, 118.48, 111.76 (7 × indolyl C), 95.51 (CSH). FT-IR (ATR, ν, cm<sup>-1</sup>): 3394, 3109, 3052, 2520, 1615, 1454, 1409, 1339, 1323, 1239, 1090, 1004, 930, 818, 740.
